# Supplementary material
Source: MDPI journal article supplement (https://www.mdpi.com/search?q=molecules-23-02292)
Supplement: s001 [file molecules-23-02292-s001.pdf]

# Structural Diversity of Six Coordination Polymers Based on the Designed X-Shaped Ligand 1,1,1,1-Tetrakis[(3-pyridiniourea)methyl]methane

Qi-Long Zhang <sup>1,2,\*</sup>, Qing Yu <sup>2</sup>, Hai-Fang Xie <sup>2</sup>, Bo Tu <sup>2,\*</sup>, Hong Xu <sup>2</sup>, Ya-Li Huang <sup>2</sup>, Xiao-Sheng Yang <sup>1</sup>

<sup>1</sup> State Key Laboratory of Functions and Applications of Medicinal Plants, Guizhou Medical University, Guiyang 550014, China; gzcnp@sina.cn

<sup>2</sup> School of Basic Medical Science, Guizhou Medical University, Guiyang 550004, China; yq518328@126.com (Q.Y.); x1352316768@126.com (H.F.X.); xuhong@gmc.edu.cn (H.X.); ylh6401@gmc.edu.cn (Y.L.H.)

\* Correspondence: sciqlzhang@gmc.edu.cn or gzuqlzhang@126.com (Q.L.Z.); tubo@gmc.edu.cn (B.T.); Fax: +86-851-8817-4017 (Q.L.Z.); +86-851-8817-4017 (B.T.)

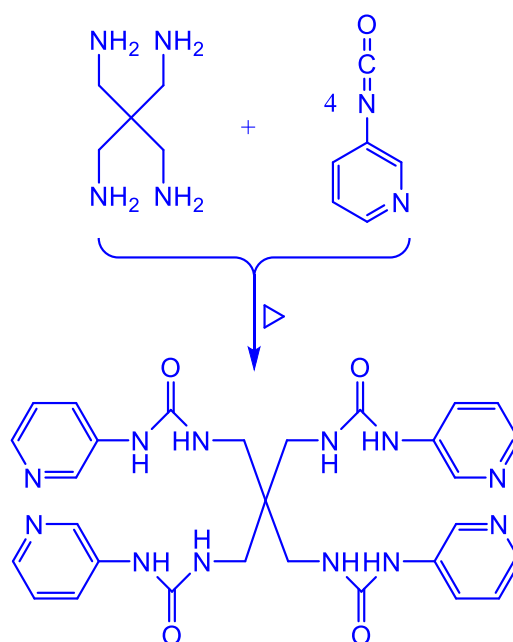

**Scheme S1.** The synthesis route of the X-shaped urea-based ligand.

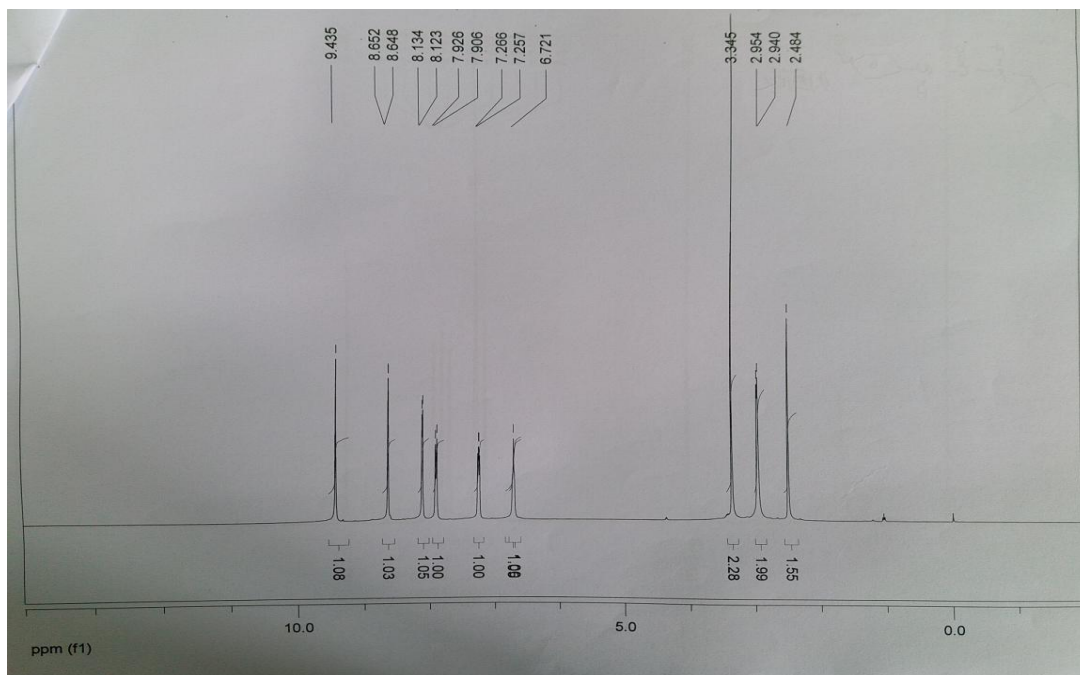

Figure S1. <sup>1</sup>H-NMR spectrum of the ligand L

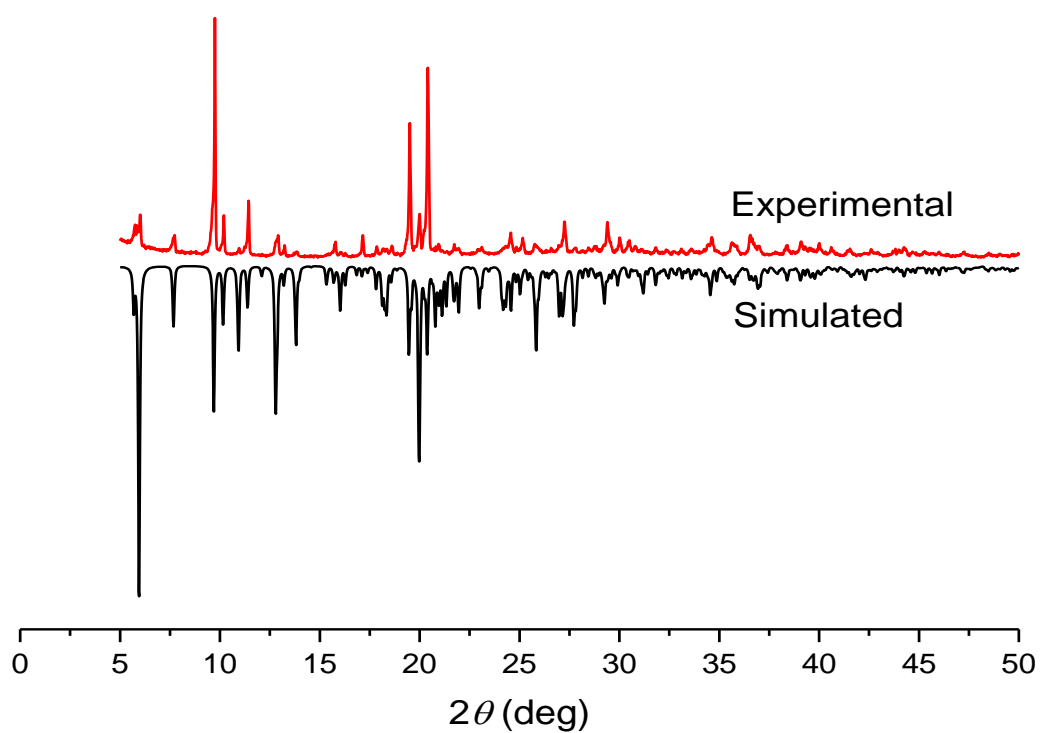

(a)

Figure S2. Cont.

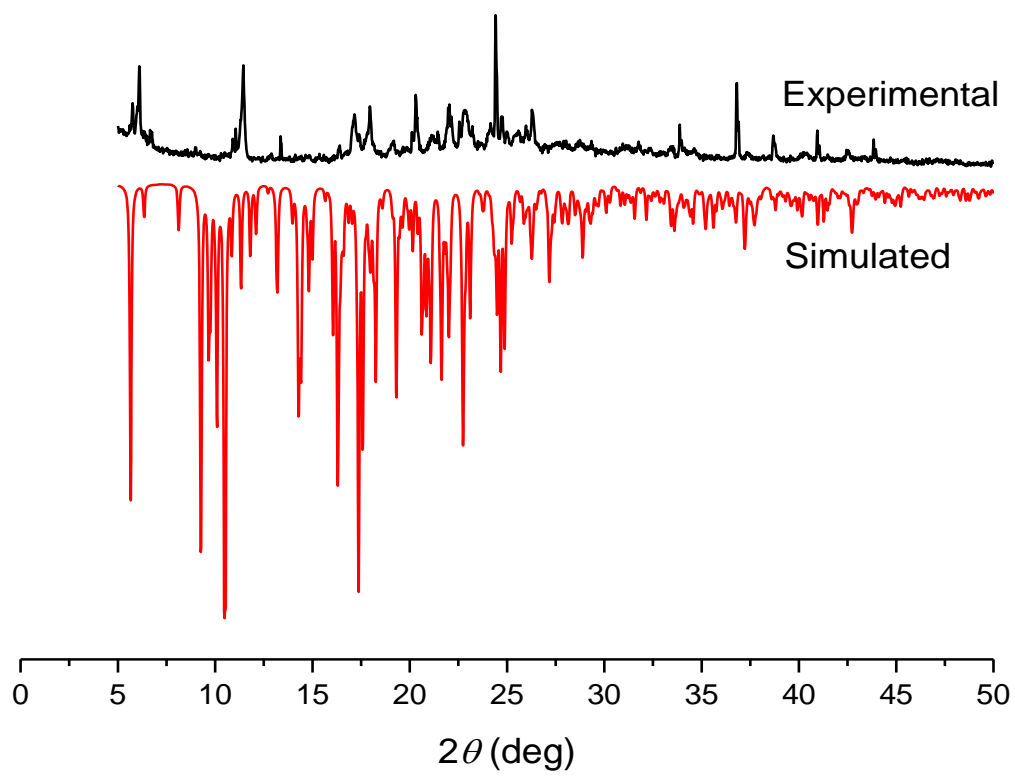

(b)

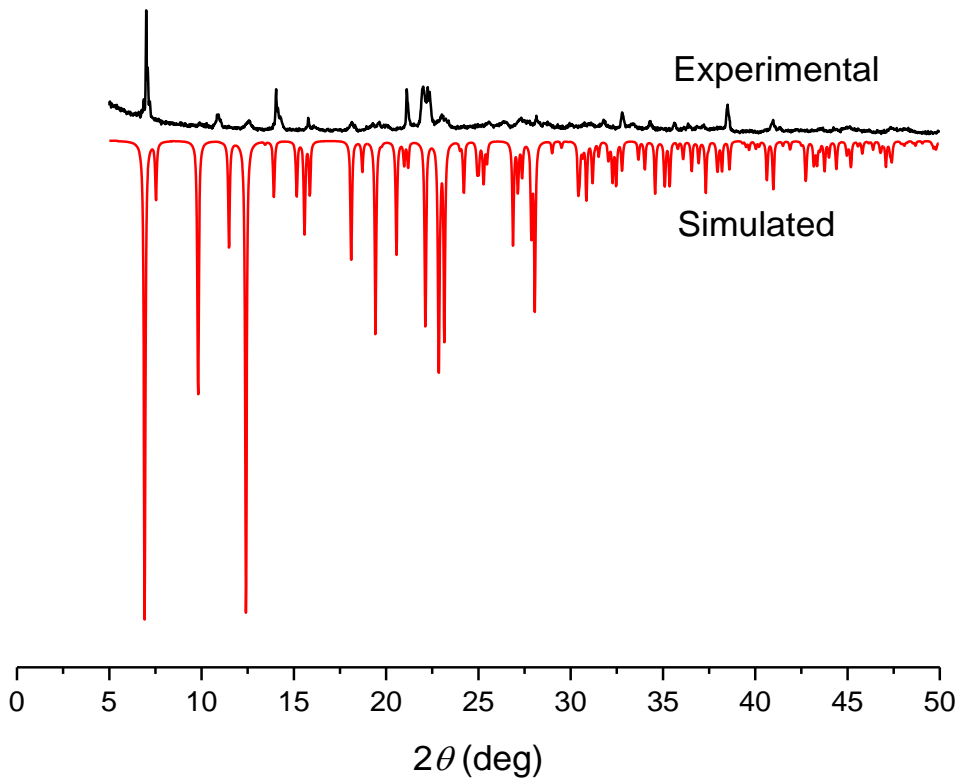

(c)

Figure S2. *Cont.*

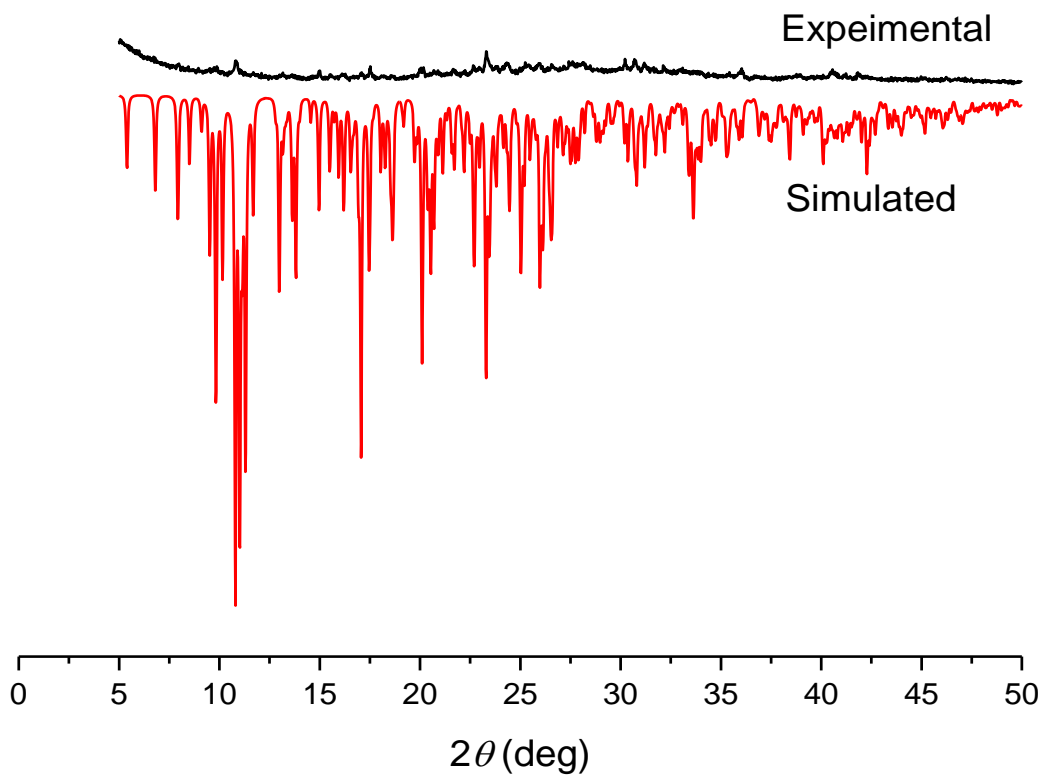

(d)

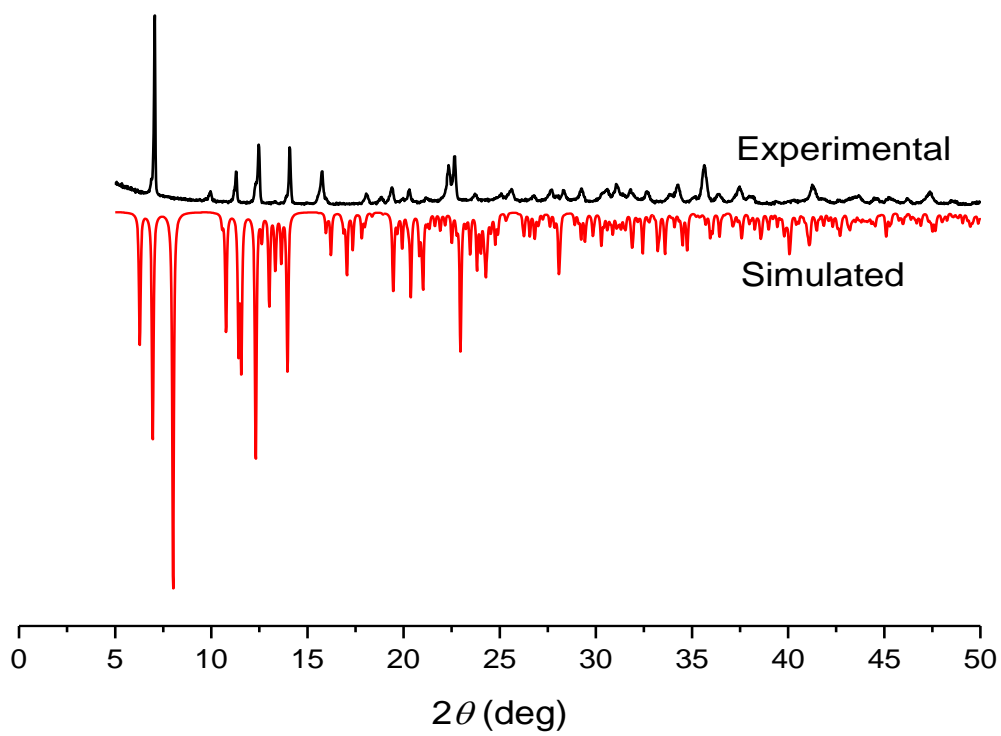

(e)

Figure S2. Cont.

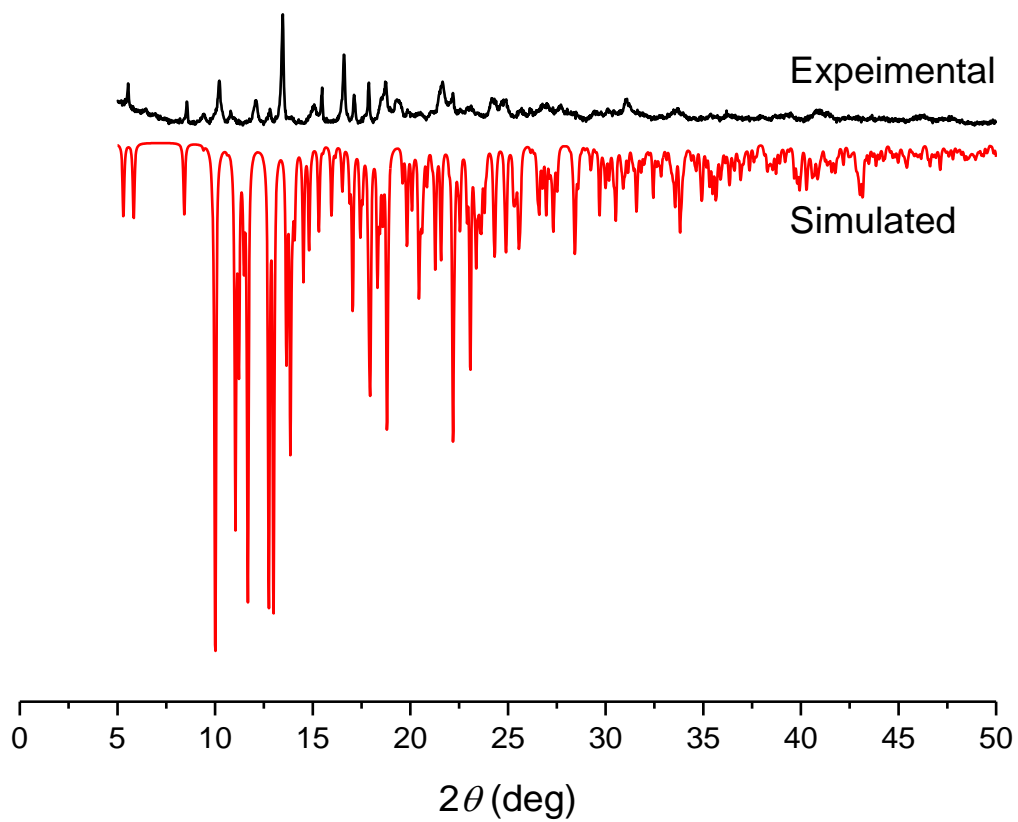

(f)

**Figure S2.** PXRD patterns of **1** (a), **2** (b), **3** (c), **4** (d), **5** (e) and **6** (f)

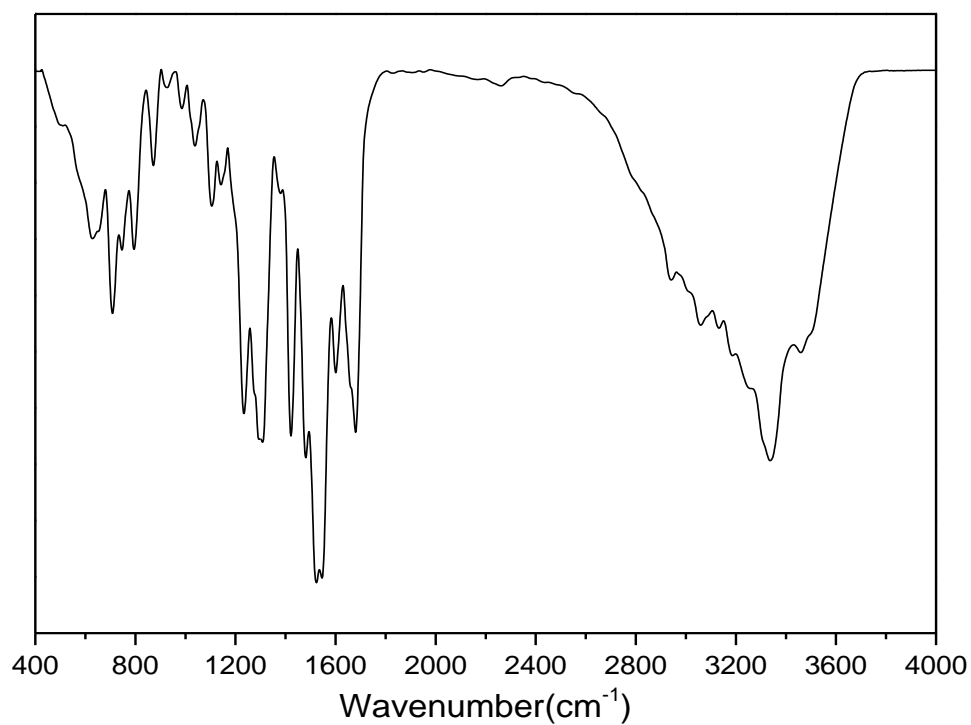

Ligand

**Figure S3.** *Cont.*

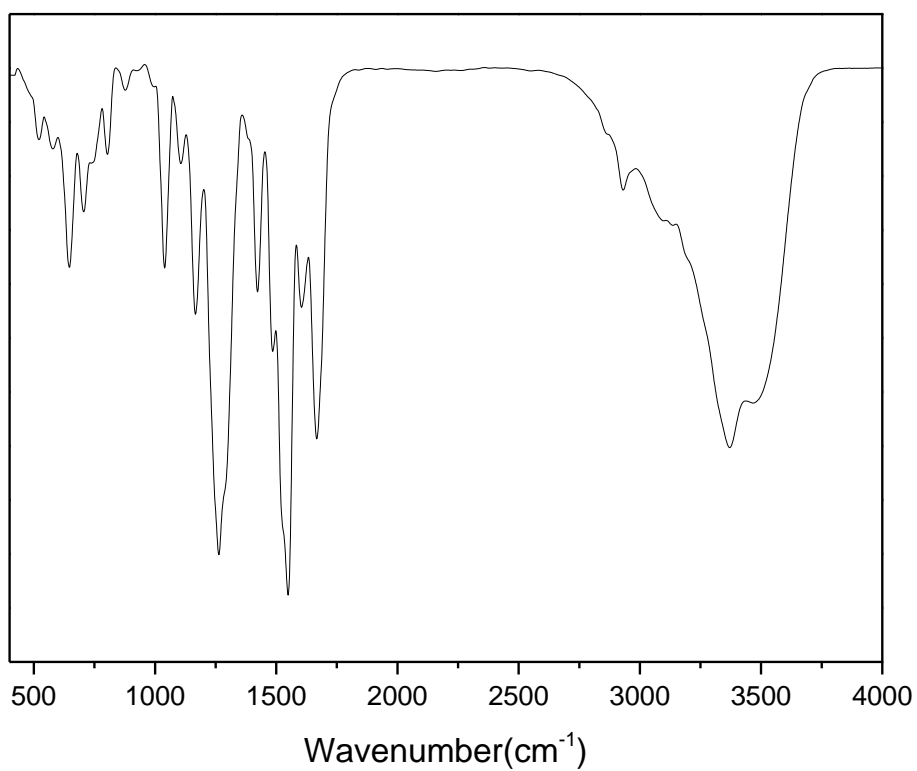

Complex 1

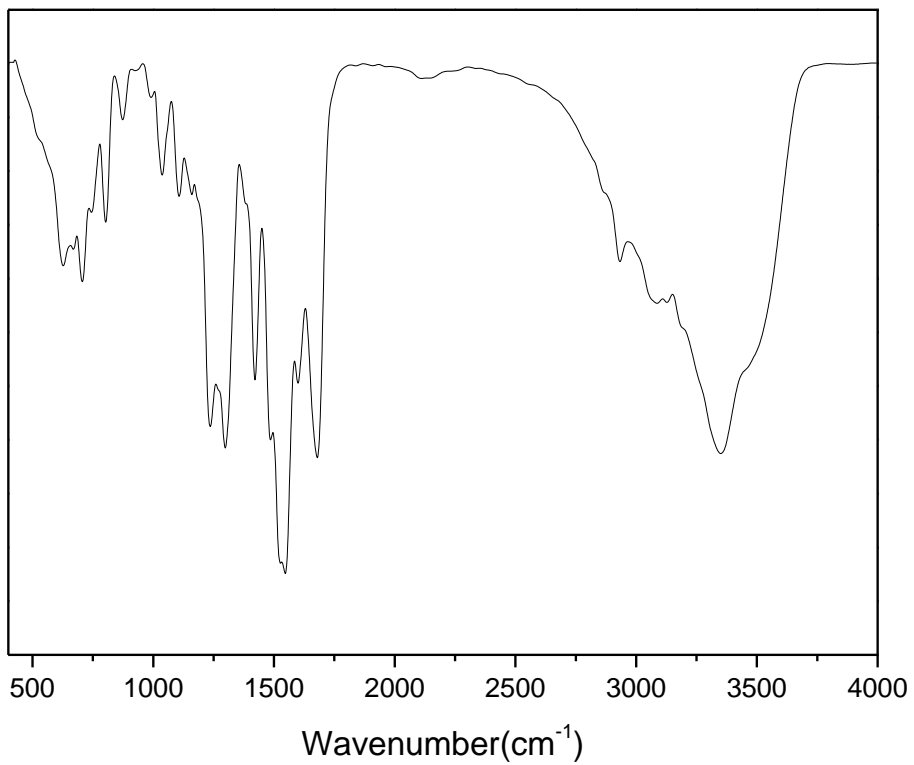

Complex 2

Figure S3. *Cont.*

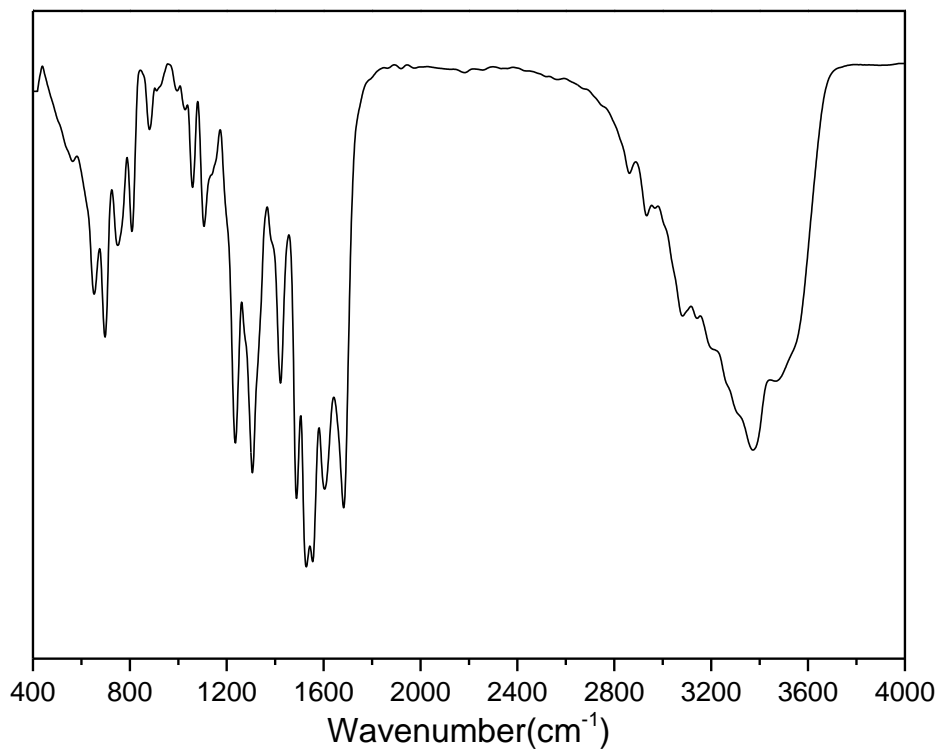

Complex 3

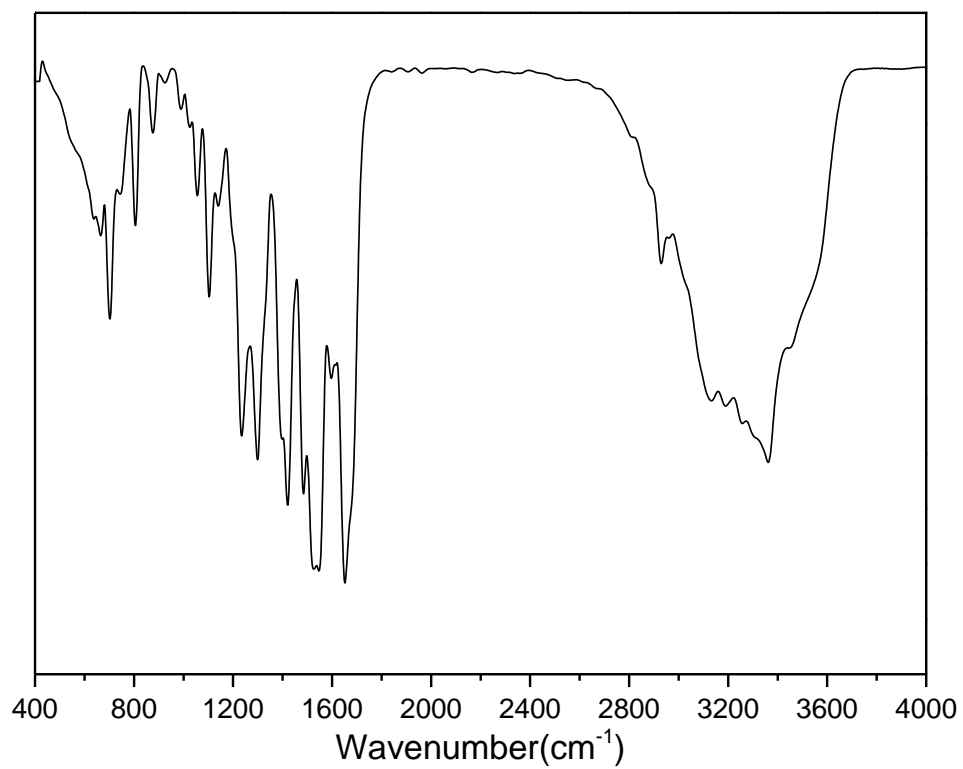

Complex 4

Figure S3. *Cont.*

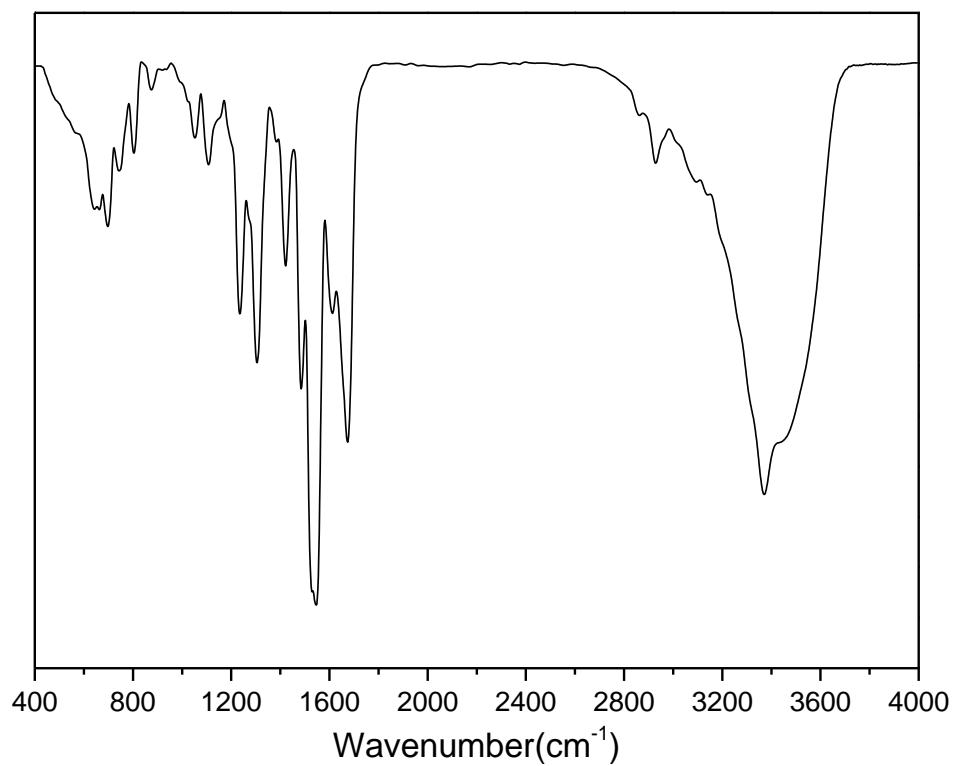

Complex 5



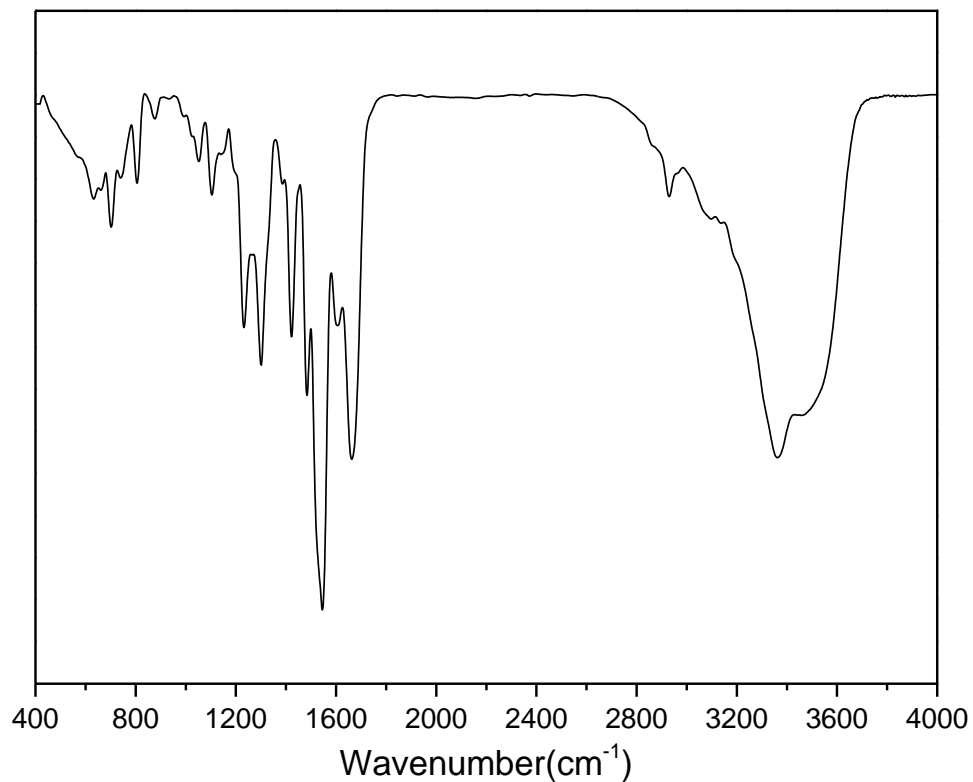

Complex 6

Figure S3. The IR spectra of the Ligand and Complexes 1-6.

Table S1. Selected bond lengths (Å) and angles (°) for 1-6.

| Complex 1   |            |              |            |             |            |             |            |
|-------------|------------|--------------|------------|-------------|------------|-------------|------------|
| Ag2-N11     | 2.109(9)   | Ag2-N12      | 2.118(8)   | O9-Ag1      | 2.54(2)    | N9-Ag1      | 2.131(7)   |
| N10-Ag1     | 2.132(7)   | N9-Ag1-N10   | 178.4(3)   | N9-Ag1-O9   | 84.5(6)    | N10-Ag1-O9  | 97.0(6)    |
| N11-Ag2-N12 | 165.1(3)   | N11-Ag2-Ag2  | 90.6(2)    |             |            |             |            |
| Complex 2   |            |              |            |             |            |             |            |
| N1-Ag1      | 2.239(7)   | N9-Ag1       | 2.357(7)   | N12-Ag1     | 2.415(7)   | N6-Ag1      | 2.303(7)   |
| N1-Ag1-N9   | 112.9(2)   | N1-Ag1-N12   | 111.3(3)   | N1-Ag1-N6   | 131.5(2)   | N9-Ag1-N12  | 94.9(2)    |
| N6-Ag1-N9   | 102.8(2)   | N6-Ag1-N12   | 96.6(3)    |             |            |             |            |
| Complex 3   |            |              |            |             |            |             |            |
| Zn1-N1      | 2.020(6)   | Zn1-I2       | 2.577(3)   | Zn1-I1      | 2.637(4)   | Zn1A-N1     | 2.013(7)   |
| Zn1A-I2A    | 2.586(4)   | Zn1A-I1A     | 2.645(10)  | N1-Zn1-N1   | 105.7(4)   | N1-Zn1-I2   | 112.99(18) |
| N1-Zn1-I2   | 112.99(18) | N1-Zn1-I1    | 100.51(19) | N1-Zn1-I1   | 100.51(19) | I2-Zn1-I1   | 122.16(12) |
| N1-Zn1A-N1  | 106.1(4)   | N1-Zn1A-I2A  | 103.86(19) | N1-Zn1A-I2A | 103.86(19) | N1-Zn1A-I1A | 88.3(2)    |
| N1-Zn1A-I1A | 88.3(2)    | I2A-Zn1A-I1A | 159.4(2)   |             |            |             |            |
| Complex 4   |            |              |            |             |            |             |            |
| O1W-Cd1     | 2.407(9)   | O5-Cd1       | 2.338(7)   | Cd1-N1      | 2.327(8)   | Cd1-N4      | 2.364(8)   |
| Cd1-N10     | 2.376(8)   | Cd1-I4       | 2.855(4)   | Cd2-N7      | 2.339(8)   | Cd2-I2      | 2.728(3)   |

|                  |            |             |            |             |            |             |            |
|------------------|------------|-------------|------------|-------------|------------|-------------|------------|
| Cd2-I3           | 2.733(2)   | Cd2-I1      | 2.743(3)   | N1-Cd1-O5   | 88.0(3)    | N1-Cd1-N4   | 95.3(3)    |
| O5-Cd1-N4        | 165.1(3)   | N1-Cd1-N10  | 173.3(3)   | I3-Cd2-I1   | 117.39(10) | I2-Cd2-I1   | 112.42(9)  |
| O5-Cd1-N10       | 86.8(3)    | N4-Cd1-N10  | 88.7(3)    | N1-Cd1-O1W  | 86.8(3)    | O5-Cd1-O1W  | 81.2(3)    |
| N4-Cd1-O1W       | 84.5(3)    | N10-Cd1-O1W | 88.2(3)    | N1-Cd1-I4   | 91.8(2)    | O5-Cd1-I4   | 98.2(2)    |
| N4-Cd1-I4        | 96.2(2)    | N10-Cd1-I4  | 93.1(2)    | O1W-Cd1-I4  | 178.5(2)   | N7-Cd2-I2   | 103.2(2)   |
| N7-Cd2-I3        | 102.0(3)   | I2-Cd2-I3   | 118.40(9)  | N7-Cd2-I1   | 99.5(2)    |             |            |
| <b>Complex 5</b> |            |             |            |             |            |             |            |
| N1-Hg1           | 2.452(6)   | N6-Hg2      | 2.394(5)   | I1-Hg1      | 2.6434(9)  | I2-Hg1      | 2.6416(7)  |
| I3-Hg2           | 2.6511(8)  | I4-Hg2      | 2.6499(9)  | Hg1-N1      | 2.452(6)   | Hg2-N6      | 2.394(5)   |
| N1-Hg1-N1        | 91.1(3)    | N1-Hg1-I2   | 99.29(14)  | N1-Hg1-I2   | 99.29(14)  | N1-Hg1-I1   | 100.55(15) |
| N1-Hg1-I1        | 100.55(15) | I2-Hg1-I1   | 151.51(3)  | N6-Hg2-N6   | 85.6(3)    | N6-Hg2-I4   | 104.79(13) |
| N6-Hg2-I4        | 104.79(13) | N6-Hg2-I3   | 103.79(13) | N6-Hg2-I3   | 103.79(13) | I4-Hg2-I3   | 140.66(3)  |
| <b>Complex 6</b> |            |             |            |             |            |             |            |
| N1-Hg1           | 2.398(9)   | N4-Hg1      | 2.449(11)  | N7-Hg2      | 2.424(8)   | N10-Hg2     | 2.415(11)  |
| Cl1-Hg1          | 2.314(3)   | Cl2-Hg1     | 2.330(4)   | Cl3-Hg2     | 2.329(6)   | Cl4-Hg2     | 2.325(5)   |
| Cl1-Hg1-Cl2      | 152.97(15) | Cl1-Hg1-N1  | 100.8(2)   | Cl2-Hg1-N1  | 103.2(2)   | Cl1-Hg1-N4  | 95.4(3)    |
| Cl2-Hg1-N4       | 99.6(3)    | N1-Hg1-     | N4 83.1(4) | Cl4-Hg2-Cl3 | 146.4(2)   | Cl4-Hg2-N10 | 101.2(3)   |
| Cl3-Hg2-N10      | 101.5(3)   | Cl4-Hg2-N7  | 102.6(3)   | Cl3-Hg2-N7  | 100.7(3)   | N10-Hg2-N7  | 92.4(3)    |

---
